# Supplementary material for: Impact of multimorbidity and complex multimorbidity on mortality among older Australians aged 45 years and over: a large population-based record linkage study
Source: HighWire-hosted journal article supplement (doi:10.1136/bmjopen-2021-060001), 2022-07-01
Supplement: bmjopen-2021-060001supp001_data_supplement.pdf [file bmjopen-2021-060001supp001_data_supplement.pdf]

## Supplementary Tables

Table S1: Characteristics variables, data sources and descriptions

| Characteristics                                    | Data source                 | Question                                                                                     | Categorisation for analysis                                                                                                                                                                                       |
|----------------------------------------------------|-----------------------------|----------------------------------------------------------------------------------------------|-------------------------------------------------------------------------------------------------------------------------------------------------------------------------------------------------------------------|
| <b>Demographic characteristics</b>                 |                             |                                                                                              |                                                                                                                                                                                                                   |
| Age group                                          | 45 And Up Study<br>Baseline | Self-reported age at<br>baseline                                                             | 45-59 years<br>60-74<br>75+                                                                                                                                                                                       |
| Gender                                             | 45 And Up Study<br>Baseline | Self-reported sex                                                                            | Male<br>Female                                                                                                                                                                                                    |
| Highest qualification                              | 45 And Up Study<br>Baseline | Self-reported highest<br>level of educational<br>qualification –<br>categorised as           | No school certificate or other<br>qualification<br>School or intermediate certificate<br>Higher school or leaving certificate<br>Trade or apprenticeship<br>Certificate or diploma<br>University degree or higher |
| Speaks a language<br>other than English at<br>home | 45 And Up Study<br>Baseline | Whether speaks a<br>language other than<br>English at home?                                  | Yes: Speaks language other than<br>English at home<br>No: Speaks only English at home                                                                                                                             |
| Born in Australia                                  | 45 And Up Study<br>Baseline | In which country where<br>you born                                                           | No: Otherwise<br>Yes: Born in Australia                                                                                                                                                                           |
| Speaks language other<br>than English at home      | 45 And Up Study<br>Baseline | Do you speak a language<br>other than English at<br>home?                                    | Yes<br>No                                                                                                                                                                                                         |
| Household income                                   | 45 And Up Study<br>Baseline | Self-reported household<br>income category                                                   | <\$20,000<br>\$20,000-39,999<br>\$40,000-69,999<br>\$70,000 or more<br>Won't disclose                                                                                                                             |
| Work status                                        | 45 And Up Study<br>Baseline | Working status at<br>baseline                                                                | Not working<br>Working part-time/full-time                                                                                                                                                                        |
| Currently<br>married/partnered                     | 45 And Up Study<br>Baseline | Current marital status: or<br>not                                                            | Yes: currently married/partnered<br>No: Not currently married/partnered                                                                                                                                           |
| <b>Health characteristics</b>                      |                             |                                                                                              |                                                                                                                                                                                                                   |
| Current smoker                                     | 45 And Up Study<br>Baseline | Smoking status at<br>baseline                                                                | Yes: Currently smoking<br>No: Non-smoker or ex-smoker                                                                                                                                                             |
| Adequate physical<br>activity                      | 45 And Up Study<br>Baseline | Based on the amount of<br>moderate and vigorous<br>exercise reported: see<br>AIHW definition | Yes: Adequate physical activity<br>No: Inadequate physical activity                                                                                                                                               |
| Alcohol consumption                                | 45 And Up Study<br>Baseline | Based on self-reported<br>number of standard<br>drinks each week,<br>categorised as          | zero<br>low (1-14 drinks per week)<br>high (>14 drinks per week)                                                                                                                                                  |

| Characteristics                                                | Data source                 | Question                                                                                                                                                                                                                                                                                                                                       | Categorisation for analysis                                                                                                                                     |
|----------------------------------------------------------------|-----------------------------|------------------------------------------------------------------------------------------------------------------------------------------------------------------------------------------------------------------------------------------------------------------------------------------------------------------------------------------------|-----------------------------------------------------------------------------------------------------------------------------------------------------------------|
| BMI                                                            | 45 And Up Study<br>Baseline | Calculation based on 2 questions: How tall are you without shoes? How much do you weigh?                                                                                                                                                                                                                                                       | Underweight: <18.5<br>Normal weight: 18.6-24.9<br>Overweight: 25.0-29.9<br>Obese: ≥30                                                                           |
| Self-reported good quality of life                             | 45 And Up Study<br>Baseline | Based on self-rated quality of life question – classified as yes if responded as good; very good or excellent                                                                                                                                                                                                                                  | Yes: Excellent, very good or good quality of life<br>No: Fair or poor quality of life                                                                           |
| Psychological distress-Index calculated based on 10 indicators | 45 And Up Study<br>Baseline | During the past 4 weeks about how often did you feel:<br>Tired out for now good reason?<br>Nervous?<br>so nervous that nothing could calm you down?<br>Hopeless?<br>Restless or fidgety?<br>So restless that you could not sit still?<br>Depressed?<br>That everything was an effort?<br>So sad that nothing could cheer you up?<br>Worthless? | 1=None of the time<br>2=A little of the time<br>3=Some of the time<br>4=Most of the time<br>5=All the time<br><br>Low= total score <22<br>High= total score ≥22 |
| Add Needing help with daily activity                           | 45 And Up Study<br>Baseline | Do you regularly need help with daily tasks because of long-term illness or disability                                                                                                                                                                                                                                                         | Yes<br>No                                                                                                                                                       |
